# Supplementary material for: Sensitive and rapid determination of heat shock protein 70 using lateral flow immunostrips and upconversion nanoparticle fluorescence probes
Source: Royal Society of Chemistry journal article supplement (doi:10.1039/d2an00742h), 2022-01-01
Supplement: d2an00742h1.pdf [file d2an00742h1.pdf]

## Electronic Supporting Material (ESM)

# Sensitive and rapid determination of heat shock proteins 70 using Lateral flow fluorescence immunostrips and upconversion nanoparticles as reporters

Nengying Wu<sup>1,2</sup>, Yuxi Wei<sup>1</sup>, Lanlan Pan<sup>1</sup>, Xiaolin Yang<sup>1</sup>, Honglan Qi<sup>1</sup>, Qiang Gao<sup>1</sup>,

Chengxiao Zhang<sup>1\*</sup>, Chen-zhong Li<sup>3\*</sup>

<sup>1</sup> *Key Laboratory of Analytical Chemistry for Life Science of Shaanxi Province,  
School of Chemistry and Chemical Engineering, Shaanxi Normal University, Xi'an,  
710062, P.R. China*

<sup>2</sup> *Guizhou Academy of Forestry, Guiyang, P.R. China*

<sup>3</sup> *Department of Biochemistry and Molecular Biology, Tulane University School of  
Medicine, New Orleans, Louisiana, USA*

### Contents

1. Experimental
  - 1.1 *Synthesis of signal probe UCNP-Ab1 conjugate*
2. Results and discussion
  - 2.1 *Feasibility of the method using prepared lateral flow immunostrips*
  - 2.2 *Reproducibility*

## 1. Experimental

### 1.1 *Synthesis of signal probe UCNP-Ab2 conjugate*

The signal probe UCNP-Ab2 conjugate was synthesized by covalently coupling the antibodies (Ab2) to the carboxylated UCNP via the condensation reaction between the amino group of the Hsp70 antibody (Ab2) and carboxyl group on the surface of UCNP in three steps.<sup>1,2</sup> Firstly, 1 mL of 10 mg/mL UCNP-PAA aqueous solution was added by a pipette into a disposable test tube (2.5 mL), and then was centrifuged in a high-speed refrigerated centrifuge (1,0000 rpm for 10 min). The supernatant was discarded and then added 1 mL of cleaning solution (3.3 mL dimethyl sulfoxide, 0.2 mL of 1 mM 2-morpholinoethanesulfonic acid and 6.5 mL of ultrapure water), allowed to be ultrasonicated for 2 min for three times. The UCNP-PAA nanoparticles finally re-suspended in 1.0 mL of 1 mM MES (pH= 6.10) buffer. Secondly, 30  $\mu$ L of 6 mg/mL EDC solution and 30  $\mu$ L of 6 mg/mL Sulfo-NHS solution were added into 1.0 mL of cleaned UCNP-PAA nanoparticles, and then allowed to stir at constant temperature mixer (400 rpm, 37 °C, 1 h), to activate the surface carboxylation of UCNP-PAA. The activated solution was centrifuged (1,0000 rpm, 10 min), cleaned as described above and then suspended in a 1 mL of 1 mM MES buffer (pH=6.10). Thirdly, 1.0 mL of UCNP-PAA dispersion (10 mg/mL) was mixed with 100  $\mu$ L of 0.5 mg/mL Hsp70 Ab2 and incubated for 3 h at constant temperature mixer (400 rpm 37 °C). The UCNP-Ab2 conjugates were centrifuged 10 min at 8,000 rpm, and then washed three times with 1 $\times$ PBS, finally dispersed in 1.0 mL of 1 $\times$ PBS. The concentration of UCNP-Ab2 conjugate suspension solution was expressed to be 10 mg/mL based on the amount of UCNP-PAA in the solution.

## 2. Results and discussion

### 2.1 Feasibility of the method using prepared lateral flow immunostrips

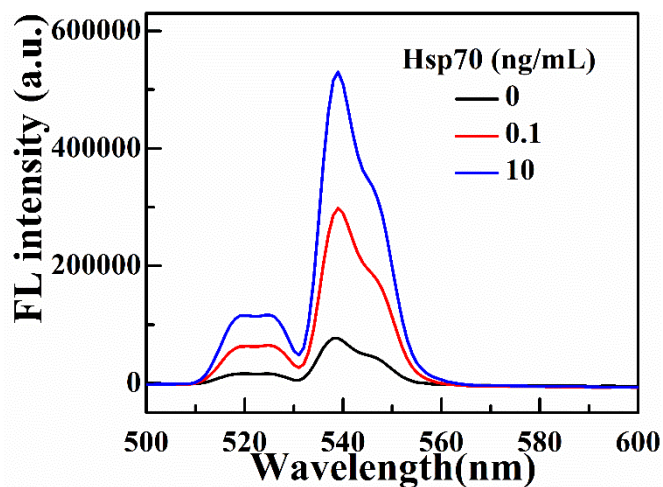

**Fig. S1** The representative FL spectra obtained on the test zone.  $\lambda_{ex}=980$  nm;  $\lambda_{em}= 540$  nm (10  $\mu$ L of 10 mg/mL UCNP-Ab2, 2  $\mu$ L of 2.0 mg/mL Hsp70 Ab1, and 20  $\mu$ L of Hsp70 solution)

### 2.2 Reproducibility

Table S1 The obtained PL intensity in the Hsp70 solutions (A-6 nM, B-8 nM) for 7 duplicates

|   | PL intensity |        |        |        |        |        |        | mean   | SD    | RSD  |
|---|--------------|--------|--------|--------|--------|--------|--------|--------|-------|------|
| A | 411697       | 404594 | 421211 | 396944 | 399222 | 433386 | 441984 | 415576 | 17304 | 4.2% |
| B | 524169       | 501646 | 533445 | 553462 | 541324 | 469010 | 537198 | 526750 | 21062 | 4.0% |

## References

- 1 M. A. Shevtsov, L. Y. Yakovleva, B. P. Nikolaev, Y. Y. Marchenko, A. V. Dobrodumov, K. V. Onokhin, Y. S. Onokhina, S. A. Selkov, A. L. Mikhrina, I. V. Guzhova, M. G. Martynova, O. A. Bystrova, A. M. Ischenko and B. A. Margulis, *Neuro-Oncol.*, 2013, 16, 38-49.
- 2 M. K. Gehrmann, M. A. Kimm, S. Stangl, T. E. Schmid, P. B. Noël, E. J. Rummeny and G. Multhoff, *Int. J. Nanomed.*, 2015, 10, 5687-5700.
